# Supplementary material for: Cytotoxicity and RNA-sequencing analysis of macrophages after exposure to vanadium dioxide nanoparticles
Source: Royal Society of Chemistry journal article supplement (doi:10.1039/d2en00404f), 2022-01-01
Supplement: d2en00404f1.pdf [file d2en00404f1.pdf]

## Supplementary Data

### **Cytotoxicity and RNA-sequencing analysis of macrophages after exposure to vanadium dioxide nanoparticles**

Wen-Song Xi,<sup>a,b</sup> Jia-Bei Li,<sup>b</sup> Xue-Rui Tang,<sup>b</sup> Shi-Ying Tan,<sup>b</sup> Aoneng Cao,<sup>b</sup> Yuanfang Liu,<sup>b,c</sup> and Haifang Wang<sup>b\*</sup>

<sup>a</sup> School of Biomedical Engineering, Sun Yat-Sen University, Guangzhou 510006, China

<sup>b</sup> Institute of Nanochemistry and Nanobiology, Shanghai University, Shanghai 200444, China

<sup>c</sup> Beijing National Laboratory for Molecular Sciences, College of Chemistry and Molecular Engineering, Peking University, Beijing 100871, China

\*Corresponding author: H. Wang. Email: hwang@shu.edu.cn

**Table S1.** The sequences of qPCR primer pairs.

| Gene          | Forward sequence (5'-3') | Reverse sequence (5'-3')    |
|---------------|--------------------------|-----------------------------|
| GAPDH         | TGTGTCCGTCGTGGATCTGA     | TTGCTGTTGAAGTCGCAGGAG       |
| Bcl-2         | TTCAGGGATGGGGTGAAC TG    | CACAGGGCGATGTTGT            |
| BAX           | CCCGAGAGGTCTTCTTCC       | GCCTTGAGCACCAGTTTG          |
| CHOP          | CCACCACACCTGAAAGCAGAA    | GGTGCCCCCAATTTTCATCT        |
| EIF2 $\alpha$ | CAACGTGGCAGCCTTACA       | TTTCATGTCATAAAGTTGTAGGTTAGG |
| ATF4          | AGCCCCACAACATGAC         | CCACCTCCAGATAGTCAT          |
| ATF6          | GATGCAGCACATGAGGCTTA     | CAGGAACGTGCTGAGTTGAA        |
| IRE1          | CTGTGGTCAAGATGGACTGG     | GAAGCGGGAAGTGAAGTAGC        |
| BIP           | CTATTCCTGCGTCGGTGTGT     | GCAAGAACTTGATGTCCTGCT       |
| PERK          | CACGCAGATCACAGTCAGGT     | GGGCTGAGGATGGAAAAGCC        |
| XBP1s         | GAGTCCGCAGCAGGTG         | GTGTCAGAGTCCATGGGA          |

**Table S2.** Quality control data statistics.

| Sample               | Clean reads | Clean bases | Error rate (%) | Q20 (%) |
|----------------------|-------------|-------------|----------------|---------|
| Cont-1               | 46075704    | 6894831489  | 0.0237         | 98.54   |
| Cont-2               | 57989170    | 8680540290  | 0.0237         | 98.55   |
| Cont-3               | 57388948    | 8589625041  | 0.0234         | 98.69   |
| M-VO <sub>2</sub> -1 | 62125294    | 9270075833  | 0.0236         | 98.61   |
| M-VO <sub>2</sub> -2 | 61014432    | 9115593597  | 0.0236         | 98.61   |
| M-VO <sub>2</sub> -3 | 64202988    | 9604101155  | 0.0234         | 98.70   |
| S-VO <sub>2</sub> -1 | 47887696    | 7161906395  | 0.0250         | 98.05   |
| S-VO <sub>2</sub> -2 | 53271004    | 7971421478  | 0.0235         | 98.63   |
| S-VO <sub>2</sub> -3 | 58900546    | 8803743066  | 0.0235         | 98.65   |

**Table S3.** The differentially expressed up-regulated genes between the control and S-VO<sub>2</sub> in RAW264.7 macrophages.

| Gene_id            | Gene_name | Log <sub>2</sub> FC (S-VO <sub>2</sub> /Cont) |
|--------------------|-----------|-----------------------------------------------|
| ENSMUSG00000085586 | Gm11613   | 1.148                                         |
| ENSMUSG00000028865 | Cd16412   | 1.110                                         |
| ENSMUSG00000107944 | Gm44280   | 1.665                                         |
| ENSMUSG00000039239 | Tgfb2     | 1.619                                         |
| ENSMUSG00000103464 | Gm38246   | 1.055                                         |
| ENSMUSG00000053646 | Plxnb1    | 1.686                                         |
| ENSMUSG00000024958 | Gpr137    | 1.111                                         |
| ENSMUSG00000036560 | Lgi4      | 1.381                                         |
| ENSMUSG00000024347 | Psd2      | 1.669                                         |
| ENSMUSG00000041757 | Plekha6   | 1.222                                         |
| ENSMUSG00000094724 | Rnaset2b  | 1.103                                         |
| ENSMUSG00000092444 | Gm18733   | 1.406                                         |
| ENSMUSG00000055494 | Gm14168   | 1.798                                         |
| ENSMUSG00000021403 | Serpib9b  | 1.240                                         |
| ENSMUSG00000025473 | Adam8     | 1.296                                         |
| ENSMUSG00000048617 | Rtbdn     | 1.030                                         |

|                    |               |       |
|--------------------|---------------|-------|
| ENSMUSG00000020484 | XBP-1S        | 1.041 |
| ENSMUSG00000040276 | Pacsin1       | 1.195 |
| ENSMUSG00000034990 | Otoa          | 1.558 |
| ENSMUSG00000074671 | Tspyl3        | 1.246 |
| ENSMUSG00000087408 | Cers1         | 1.576 |
| ENSMUSG00000025408 | CHOP          | 1.658 |
| ENSMUSG00000108596 | Itgam         | 1.172 |
| ENSMUSG00000030340 | Scnn1a        | 1.101 |
| ENSMUSG00000103588 | Gm18445       | 1.420 |
| ENSMUSG00000030098 | Grip2         | 1.044 |
| ENSMUSG00000049719 | Prss46        | 1.106 |
| ENSMUSG00000078486 | Perm1         | 1.405 |
| ENSMUSG00000021983 | Atp8a2        | 1.592 |
| ENSMUSG00000004105 | Angptl2       | 1.659 |
| ENSMUSG00000053693 | Mast1         | 1.347 |
| ENSMUSG00000022074 | Tnfrsf10b     | 1.026 |
| ENSMUSG00000021265 | Slc25a29      | 1.078 |
| ENSMUSG00000050357 | Carmil2       | 1.303 |
| ENSMUSG00000071192 | Wfikkn1       | 1.334 |
| ENSMUSG00000030882 | Dnhd1         | 1.692 |
| ENSMUSG00000049721 | Gal3st1       | 2.032 |
| ENSMUSG00000086598 | Btbd18        | 1.054 |
| ENSMUSG00000025269 | Apex2         | 1.084 |
| ENSMUSG00000074259 | Gramd2        | 1.052 |
| ENSMUSG00000091102 | 5830462I19Rik | 1.103 |
| ENSMUSG00000031022 | BC051019      | 1.473 |
| ENSMUSG00000045114 | Prrt2         | 1.305 |
| ENSMUSG00000082791 | Gm4875        | 1.012 |
| ENSMUSG00000046854 | Pip5kl1       | 1.275 |
| ENSMUSG00000022018 | Rgcc          | 1.145 |
| ENSMUSG00000038751 | Ptk6          | 2.020 |
| ENSMUSG00000068740 | Celsr2        | 1.511 |
| ENSMUSG00000013419 | Zfp651        | 1.242 |
| ENSMUSG00000024661 | Fth1          | 1.086 |
| ENSMUSG00000027257 | Pacsin3       | 1.132 |
| ENSMUSG00000085957 | Syna          | 1.270 |
| ENSMUSG00000079243 | Xirp1         | 1.242 |
| ENSMUSG00000015627 | Gata5         | 1.081 |
| ENSMUSG00000022044 | Stmn4         | 1.010 |
| ENSMUSG00000039021 | Ttc16         | 1.215 |
| ENSMUSG00000020327 | Fgf22         | 1.270 |
| ENSMUSG00000052819 | Best2         | 1.213 |
| ENSMUSG00000020592 | Sdc1          | 1.068 |
| ENSMUSG00000105628 | Gm43350       | 1.921 |
| ENSMUSG00000023905 | Tnfrsf12a     | 1.328 |
| ENSMUSG00000028158 | Mttp          | 1.423 |

|                    |               |       |
|--------------------|---------------|-------|
| ENSMUSG00000029710 | Ephb4         | 1.498 |
| ENSMUSG00000072825 | Cep170b       | 1.057 |
| ENSMUSG00000037428 | Vgf           | 1.034 |
| ENSMUSG00000022483 | Col2a1        | 1.723 |
| ENSMUSG00000043085 | Tmem82        | 2.179 |
| ENSMUSG00000106350 | Gm4869        | 1.855 |
| ENSMUSG00000101166 | Gm28496       | 1.408 |
| ENSMUSG00000001020 | S100a4        | 1.008 |
| ENSMUSG00000020135 | Apc2          | 1.502 |
| ENSMUSG00000031302 | Nlgn3         | 1.578 |
| ENSMUSG00000030683 | Sez6l2        | 1.211 |
| ENSMUSG00000028040 | Efna4         | 1.223 |
| ENSMUSG00000040866 | Rsph6a        | 1.191 |
| ENSMUSG00000031668 | PERK          | 1.362 |
| ENSMUSG00000001739 | Cldn15        | 1.867 |
| ENSMUSG00000040205 | Cuzd1         | 1.090 |
| ENSMUSG00000090236 | Car15         | 1.135 |
| ENSMUSG00000030409 | Dmpk          | 1.236 |
| ENSMUSG00000097080 | 1700086O06Rik | 1.000 |
| ENSMUSG00000041073 | Nacad         | 1.759 |
| ENSMUSG00000037411 | Serpine1      | 1.177 |
| ENSMUSG00000089669 | Tnfsf13       | 1.157 |
| ENSMUSG00000086075 | Gm15728       | 2.377 |
| ENSMUSG00000015143 | Actn1         | 1.009 |
| ENSMUSG00000034156 | Tspoap1       | 3.618 |
| ENSMUSG00000044716 | Dok7          | 1.131 |
| ENSMUSG00000002233 | Rhoc          | 1.014 |
| ENSMUSG00000006711 | D130043K22Rik | 1.410 |
| ENSMUSG00000043099 | Hic1          | 1.970 |
| ENSMUSG00000001300 | Efnb2         | 2.226 |
| ENSMUSG00000044433 | Camsap3       | 1.272 |
| ENSMUSG00000079652 | Fam71f2       | 1.395 |
| ENSMUSG00000001930 | Vwf           | 1.553 |
| ENSMUSG00000096740 | Lbhd1         | 1.885 |
| ENSMUSG00000033368 | Trim69        | 1.389 |
| ENSMUSG00000021822 | Plau          | 1.284 |
| ENSMUSG00000037833 | Sh2d4b        | 1.055 |
| ENSMUSG00000004098 | Col5a3        | 2.020 |
| ENSMUSG00000020844 | Nxn           | 1.107 |
| ENSMUSG00000026308 | Klhl30        | 1.393 |
| ENSMUSG00000001946 | Esam          | 1.172 |
| ENSMUSG00000035033 | Tbr1          | 1.220 |
| ENSMUSG00000016995 | Matn4         | 1.432 |
| ENSMUSG00000046613 | Vwa5b2        | 1.482 |
| ENSMUSG00000073633 | Fbxo36        | 1.939 |
| ENSMUSG00000028661 | Epha8         | 1.413 |

|                    |               |       |
|--------------------|---------------|-------|
| ENSMUSG00000032131 | Abcg4         | 1.857 |
| ENSMUSG00000026604 | Ptpn14        | 2.274 |
| ENSMUSG00000028541 | B4galt2       | 1.632 |
| ENSMUSG00000062762 | Ei24          | 1.023 |
| ENSMUSG00000057967 | Fgf18         | 2.607 |
| ENSMUSG00000026932 | Nacc2         | 1.159 |
| ENSMUSG00000091017 | Fam71a        | 1.151 |
| ENSMUSG00000108236 | 0610033M10Rik | 1.550 |
| ENSMUSG00000081094 | Rpl19-ps11    | 1.560 |
| ENSMUSG00000073274 | Gm14636       | 1.210 |
| ENSMUSG00000032193 | Ldlr          | 1.087 |
| ENSMUSG00000025804 | Ccr1          | 1.026 |
| ENSMUSG00000028785 | Hpca          | 1.545 |
| ENSMUSG00000033327 | Tnxb          | 1.945 |
| ENSMUSG00000020793 | Galr2         | 1.414 |
| ENSMUSG00000007039 | Ddah2         | 1.166 |
| ENSMUSG00000040797 | Iqsec3        | 1.513 |
| ENSMUSG00000103149 | AA914427      | 1.025 |
| ENSMUSG00000038167 | Plekhg6       | 1.632 |
| ENSMUSG00000045763 | Basp1         | 1.050 |
| ENSMUSG00000048856 | Slc25a47      | 1.074 |
| ENSMUSG00000067941 | Gm7168        | 1.034 |
| ENSMUSG00000027355 | Tmco5         | 1.043 |
| ENSMUSG00000106928 | Gm43860       | 1.526 |
| ENSMUSG00000110010 | Gm45629       | 1.302 |
| ENSMUSG00000053293 | Pom121        | 1.000 |
| ENSMUSG00000044006 | Cilp2         | 2.138 |
| ENSMUSG00000040563 | Plppr2        | 1.135 |
| ENSMUSG00000056656 | Apol8         | 1.035 |
| ENSMUSG00000037649 | H2-DMa        | 2.483 |
| ENSMUSG00000039556 | Ppp1r3f       | 1.173 |
| ENSMUSG00000027456 | Sdcbp2        | 1.638 |
| ENSMUSG00000027939 | Nup210l       | 3.050 |
| ENSMUSG00000083907 | Plk-ps1       | 1.182 |
| ENSMUSG00000102543 | Pcdhgc5       | 1.513 |
| ENSMUSG00000110218 | Gm20219       | 1.478 |
| ENSMUSG00000095369 | Gm21859       | 1.588 |
| ENSMUSG00000041801 | Phlda3        | 1.640 |
| ENSMUSG00000027470 | Mylk2         | 1.748 |
| ENSMUSG00000031486 | Adgra2        | 1.848 |
| ENSMUSG00000034762 | Glis1         | 1.186 |
| ENSMUSG00000039714 | Cplx3         | 1.297 |
| ENSMUSG00000036091 | Hyal3         | 1.315 |
| ENSMUSG00000022245 | Skor1         | 1.006 |
| ENSMUSG00000041842 | Fhdc1         | 1.672 |
| ENSMUSG00000058743 | Kcnj14        | 2.324 |

|                    |               |       |
|--------------------|---------------|-------|
| ENSMUSG00000054008 | Ndst1         | 1.255 |
| ENSMUSG00000038486 | Sv2a          | 1.384 |
| ENSMUSG00000050503 | Fbxl22        | 1.079 |
| ENSMUSG00000071103 | 1700029J07Rik | 1.097 |
| ENSMUSG00000041445 | Mmrn2         | 1.545 |
| ENSMUSG00000016356 | Col20a1       | 1.866 |
| ENSMUSG00000021116 | eif2 $\alpha$ | 2.180 |
| ENSMUSG00000042828 | Trim72        | 1.942 |
| ENSMUSG00000027015 | Cybrd1        | 1.230 |
| ENSMUSG00000025013 | Tll2          | 1.220 |
| ENSMUSG00000051747 | Ttn           | 1.027 |
| ENSMUSG00000006356 | Crip2         | 1.439 |
| ENSMUSG00000042978 | Sbk1          | 1.001 |
| ENSMUSG00000023473 | Celsr3        | 1.325 |
| ENSMUSG00000026475 | Rgs16         | 1.717 |
| ENSMUSG00000039062 | Anpep         | 1.417 |
| ENSMUSG00000020902 | Ntn1          | 2.051 |
| ENSMUSG00000073599 | Ecsr          | 1.090 |
| ENSMUSG00000056569 | Mpz           | 1.404 |
| ENSMUSG00000041120 | Nbl1          | 2.139 |
| ENSMUSG00000047143 | Dmrta2        | 1.601 |
| ENSMUSG00000017767 | Spata25       | 1.040 |
| ENSMUSG00000024873 | Cnih2         | 1.909 |
| ENSMUSG00000039653 | Baat          | 1.001 |
| ENSMUSG00000038803 | Ost4          | 1.237 |
| ENSMUSG00000055865 | Fam19a3       | 1.729 |
| ENSMUSG00000031765 | Mt1           | 1.009 |
| ENSMUSG00000104158 | Gm38100       | 1.145 |
| ENSMUSG00000041351 | Rap1gap       | 1.328 |
| ENSMUSG00000086924 | Gm11766       | 1.539 |
| ENSMUSG00000107092 | Gm7993        | 2.126 |
| ENSMUSG00000050147 | F2rl3         | 1.153 |
| ENSMUSG00000042821 | Snai1         | 1.695 |
| ENSMUSG00000035745 | Grin3b        | 2.473 |
| ENSMUSG00000020695 | Mrc2          | 1.315 |
| ENSMUSG00000049928 | Glp2r         | 1.842 |
| ENSMUSG00000080717 | B230307C23Rik | 1.076 |
| ENSMUSG00000069020 | Urm1          | 1.042 |
| ENSMUSG00000026697 | Myoc          | 1.064 |
| ENSMUSG00000031028 | Tub           | 1.336 |
| ENSMUSG00000070385 | Ampd1         | 2.430 |
| ENSMUSG00000029135 | Fosl2         | 1.317 |
| ENSMUSG00000030609 | Aen           | 1.041 |
| ENSMUSG00000041881 | Ndufa7        | 1.006 |
| ENSMUSG00000082016 | Pgam1-ps2     | 1.200 |
| ENSMUSG00000032648 | Pygm          | 1.681 |

|                    |               |       |
|--------------------|---------------|-------|
| ENSMUSG00000105692 | Gm43737       | 1.114 |
| ENSMUSG00000037577 | Ephx3         | 1.459 |
| ENSMUSG00000022838 | Eaf2          | 1.055 |
| ENSMUSG00000042189 | Tekt3         | 1.385 |
| ENSMUSG00000086756 | Gm14051       | 1.034 |
| ENSMUSG00000027579 | Srms          | 2.585 |
| ENSMUSG00000043889 | Gm8399        | 1.228 |
| ENSMUSG00000032332 | Col12a1       | 1.365 |
| ENSMUSG00000040938 | Slc16a11      | 1.216 |
| ENSMUSG00000074818 | Pdzd7         | 1.482 |
| ENSMUSG00000068957 | 4930589L23Rik | 1.409 |
| ENSMUSG00000042607 | Asb4          | 2.850 |
| ENSMUSG00000042788 | Fam166b       | 1.548 |
| ENSMUSG00000045349 | Sh2d5         | 1.729 |
| ENSMUSG00000053461 | Hhip12        | 1.677 |
| ENSMUSG00000049526 | Tmem202       | 1.098 |
| ENSMUSG00000034282 | Evpl          | 2.917 |
| ENSMUSG00000044177 | Wfikkn2       | 1.557 |
| ENSMUSG00000062760 | 1810041L15Rik | 1.057 |
| ENSMUSG00000097840 | Gm26756       | 1.024 |
| ENSMUSG00000102717 | Gm37759       | 1.161 |
| ENSMUSG00000071342 | Lsmem1        | 1.147 |
| ENSMUSG00000062382 | Ftl1-ps1      | 1.071 |
| ENSMUSG00000043770 | Gm12481       | 1.077 |
| ENSMUSG00000027329 | Spef1         | 1.694 |
| ENSMUSG00000031078 | Ctnn          | 1.180 |
| ENSMUSG00000027950 | Chrn2         | 1.344 |
| ENSMUSG00000042428 | Mgat3         | 1.590 |
| ENSMUSG00000040740 | Slc25a34      | 1.306 |
| ENSMUSG00000104159 | Gm38099       | 1.119 |
| ENSMUSG00000007891 | Ctsd          | 1.142 |
| ENSMUSG00000031861 | Lpar2         | 1.788 |
| ENSMUSG00000053963 | Stum          | 1.424 |
| ENSMUSG00000005514 | Por           | 1.198 |
| ENSMUSG00000011752 | Pgam1         | 1.161 |
| ENSMUSG00000032380 | Dapk2         | 1.032 |
| ENSMUSG00000003934 | Efnb3         | 1.184 |
| ENSMUSG00000025161 | Slc16a3       | 1.081 |
| ENSMUSG00000075585 | 6330403L08Rik | 2.225 |
| ENSMUSG00000003279 | Dlgap1        | 1.221 |
| ENSMUSG00000031779 | Ccl22         | 1.055 |
| ENSMUSG00000018930 | Ccl4          | 1.532 |
| ENSMUSG00000055271 | 9330161L09Rik | 1.644 |
| ENSMUSG00000062591 | Tubb4a        | 1.499 |
| ENSMUSG00000026354 | Lct           | 1.517 |
| ENSMUSG00000046668 | Cxxc5         | 1.618 |

|                    |               |       |
|--------------------|---------------|-------|
| ENSMUSG00000027368 | Dusp2         | 1.464 |
| ENSMUSG00000048458 | Fam212b       | 1.549 |
| ENSMUSG00000103966 | Gm37120       | 2.273 |
| ENSMUSG00000019301 | Hsd17b1       | 1.148 |
| ENSMUSG00000074340 | Ovgp1         | 1.347 |
| ENSMUSG00000033717 | Adra2a        | 2.200 |
| ENSMUSG00000002100 | Mybpc3        | 3.325 |
| ENSMUSG00000020475 | Pgam2         | 1.179 |
| ENSMUSG00000028909 | Ptpru         | 1.104 |
| ENSMUSG00000110702 | Gm45767       | 1.553 |
| ENSMUSG00000005320 | Fgfr4         | 1.517 |
| ENSMUSG00000052271 | Bhlha15       | 1.189 |
| ENSMUSG00000032946 | Rasgrp2       | 1.876 |
| ENSMUSG00000030124 | Lag3          | 1.609 |
| ENSMUSG00000003379 | Cd79a         | 1.357 |
| ENSMUSG00000113322 | AC121504.1    | 1.136 |
| ENSMUSG00000020447 | Npc111        | 1.390 |
| ENSMUSG00000028794 | A3galt2       | 2.324 |
| ENSMUSG00000093910 | Zfp853        | 1.070 |
| ENSMUSG00000031906 | Smpd3         | 1.744 |
| ENSMUSG00000054312 | Mrps21        | 1.101 |
| ENSMUSG00000004933 | Matk          | 1.009 |
| ENSMUSG00000086962 | Gm12248       | 1.450 |
| ENSMUSG00000035112 | Wnk4          | 1.673 |
| ENSMUSG00000031448 | Adprh1        | 1.272 |
| ENSMUSG00000043789 | Vwce          | 1.806 |
| ENSMUSG00000006342 | Susd2         | 1.940 |
| ENSMUSG00000027570 | Col9a3        | 1.241 |
| ENSMUSG00000049649 | Gpr3          | 1.725 |
| ENSMUSG00000108353 | Gm45205       | 1.017 |
| ENSMUSG00000036492 | Rnf39         | 1.487 |
| ENSMUSG00000038370 | Pcp411        | 1.674 |
| ENSMUSG00000044816 | D630023F18Rik | 1.215 |
| ENSMUSG00000073774 | Kcnk          | 1.325 |
| ENSMUSG00000018752 | Tnfsfm13      | 1.653 |
| ENSMUSG00000052316 | Lrrc15        | 1.234 |
| ENSMUSG00000006445 | Epha2         | 1.501 |
| ENSMUSG00000035385 | Ccl2          | 1.302 |
| ENSMUSG00000047787 | Flrt1         | 1.103 |
| ENSMUSG00000026663 | ATF6          | 1.181 |
| ENSMUSG00000006575 | Rundc3a       | 1.368 |
| ENSMUSG00000038745 | Nlrp6         | 1.036 |
| ENSMUSG00000097855 | A930007I19Rik | 1.83  |
| ENSMUSG00000025386 | Pde6g         | 1.221 |
| ENSMUSG00000021223 | Papln         | 1.192 |
| ENSMUSG00000019326 | Aoc3          | 3.046 |



|                    |               |       |
|--------------------|---------------|-------|
| ENSMUSG00000050708 | Ftl1          | 1.235 |
| ENSMUSG00000026207 | Speg          | 1.076 |
| ENSMUSG00000006221 | Hspb7         | 1.120 |
| ENSMUSG00000060594 | Layn          | 1.029 |
| ENSMUSG00000029055 | Plch2         | 1.232 |
| ENSMUSG00000074899 | Sptbn5        | 1.520 |
| ENSMUSG00000007021 | Syngn3        | 1.507 |
| ENSMUSG00000073627 | C130036L24Rik | 1.602 |
| ENSMUSG00000109953 | 5430430B14Rik | 1.809 |
| ENSMUSG00000044724 | Gpr152        | 1.237 |
| ENSMUSG00000056271 | Lman11        | 1.339 |
| ENSMUSG00000033597 | Caskin1       | 1.292 |
| ENSMUSG00000074001 | Klhl40        | 1.665 |
| ENSMUSG00000002565 | Scin          | 2.198 |
| ENSMUSG00000027223 | Mapk8ip1      | 1.479 |
| ENSMUSG00000023247 | Guca2a        | 1.842 |
| ENSMUSG00000022099 | Dmtn          | 1.466 |
| ENSMUSG00000063239 | Grm4          | 1.276 |
| ENSMUSG00000022504 | Ciita         | 1.394 |
| ENSMUSG00000097337 | Gm26606       | 2.118 |
| ENSMUSG00000006216 | Clenkb        | 1.090 |
| ENSMUSG00000036858 | Ptcra         | 1.535 |
| ENSMUSG00000070576 | Mn1           | 1.638 |
| ENSMUSG00000029408 | Abcb9         | 2.325 |
| ENSMUSG00000061462 | Obscn         | 1.342 |
| ENSMUSG00000027646 | Src           | 1.217 |
| ENSMUSG00000068699 | Flnc          | 1.672 |
| ENSMUSG00000002409 | Dyrk1b        | 1.122 |
| ENSMUSG00000020080 | Hkdc1         | 1.534 |
| ENSMUSG00000017943 | Gdap111       | 2.134 |
| ENSMUSG00000027568 | Ntsr1         | 1.177 |
| ENSMUSG00000035262 | Amh           | 1.645 |
| ENSMUSG00000038264 | Sema7a        | 1.196 |
| ENSMUSG00000106807 | Gm10441       | 1.005 |
| ENSMUSG00000110423 | Gm45736       | 1.175 |
| ENSMUSG00000001444 | Tbx21         | 1.321 |
| ENSMUSG00000051439 | Cd14          | 1.051 |
| ENSMUSG00000058297 | Spock2        | 1.316 |
| ENSMUSG00000024664 | Fads3         | 1.333 |
| ENSMUSG00000034818 | Celf5         | 1.107 |
| ENSMUSG00000040283 | Btnl9         | 2.361 |
| ENSMUSG00000019464 | Ptger1        | 1.767 |
| ENSMUSG00000009350 | Mpo           | 2.854 |
| ENSMUSG00000042377 | Fam83g        | 1.484 |
| ENSMUSG00000109198 | D7Bwg0826e    | 1.378 |
| ENSMUSG00000103845 | Gm19026       | 1.551 |

|                    |               |       |
|--------------------|---------------|-------|
| ENSMUSG0000002006  | Pdzd4         | 1.605 |
| ENSMUSG00000039787 | Cercam        | 1.123 |
| ENSMUSG00000049515 | Espnl         | 1.731 |
| ENSMUSG00000085875 | Gm12905       | 2.328 |
| ENSMUSG00000033722 | BC034090      | 1.027 |
| ENSMUSG00000053846 | Lipg          | 1.084 |
| ENSMUSG00000109274 | Gm45133       | 1.059 |
| ENSMUSG00000034037 | Fgd5          | 1.566 |
| ENSMUSG00000034209 | Rasl10a       | 1.210 |
| ENSMUSG00000078137 | Ankrd63       | 2.154 |
| ENSMUSG00000074004 | B3gnt6        | 1.020 |
| ENSMUSG00000033763 | Mtss11        | 1.115 |
| ENSMUSG00000051107 | Gm15440       | 1.958 |
| ENSMUSG00000047507 | Baiap3        | 1.859 |
| ENSMUSG00000037989 | Wnk2          | 1.223 |
| ENSMUSG00000023993 | Trem1         | 1.073 |
| ENSMUSG00000042662 | Dusp15        | 1.234 |
| ENSMUSG00000034765 | Dusp5         | 1.679 |
| ENSMUSG00000032649 | Colgalt2      | 1.575 |
| ENSMUSG00000054206 | Gzmm          | 2.308 |
| ENSMUSG00000091952 | Gm17709       | 1.216 |
| ENSMUSG00000033615 | Cplx1         | 2.049 |
| ENSMUSG00000098488 | Pla2g4b       | 1.507 |
| ENSMUSG00000011179 | Odc1          | 1.944 |
| ENSMUSG00000054161 | Fam83e        | 2.098 |
| ENSMUSG00000058620 | Adra2b        | 1.351 |
| ENSMUSG00000032657 | Fam189b       | 1.565 |
| ENSMUSG00000010021 | Kif19a        | 1.433 |
| ENSMUSG00000084319 | Tpt1-ps3      | 1.004 |
| ENSMUSG00000043421 | Hilpda        | 1.592 |
| ENSMUSG00000060572 | Mfap2         | 1.264 |
| ENSMUSG00000022537 | Tmem44        | 1.363 |
| ENSMUSG00000087530 | Gm15533       | 1.152 |
| ENSMUSG00000003873 | BAX           | 1.087 |
| ENSMUSG00000105867 | Gm42517       | 1.196 |
| ENSMUSG00000033967 | Rnf225        | 2.272 |
| ENSMUSG00000094281 | Gm8034        | 1.220 |
| ENSMUSG00000039133 | 9330171B17Rik | 1.126 |
| ENSMUSG00000086228 | Ubap11        | 1.238 |
| ENSMUSG00000032482 | Cspg5         | 1.908 |
| ENSMUSG00000044390 | Tigd3         | 1.277 |
| ENSMUSG00000017817 | Jph2          | 1.519 |
| ENSMUSG00000038400 | Pmepa1        | 1.080 |
| ENSMUSG00000039376 | Synpo21       | 1.302 |
| ENSMUSG00000032595 | Cdhr4         | 1.012 |
| ENSMUSG00000097186 | Gm26595       | 1.324 |

|                    |               |       |
|--------------------|---------------|-------|
| ENSMUSG00000112652 | AC160411.2    | 1.103 |
| ENSMUSG00000025380 | Fscn2         | 1.182 |
| ENSMUSG00000029072 | Tas1r3        | 1.014 |
| ENSMUSG00000037295 | Ldlrap1       | 1.014 |
| ENSMUSG00000112246 | AC121871.1    | 1.142 |
| ENSMUSG00000097328 | Tnfsf12       | 1.451 |
| ENSMUSG00000042406 | ATF4          | 2.861 |
| ENSMUSG00000113100 | CT009754.2    | 1.601 |
| ENSMUSG00000035576 | L3mbtl1       | 1.289 |
| ENSMUSG00000000982 | Ccl3          | 1.014 |
| ENSMUSG00000041117 | Ccdc8         | 2.399 |
| ENSMUSG00000090291 | Lrrc10b       | 1.057 |
| ENSMUSG00000025650 | Col7a1        | 2.006 |
| ENSMUSG00000112496 | AC121569.2    | 1.568 |
| ENSMUSG00000034706 | Dnaic2        | 1.389 |
| ENSMUSG00000090210 | Itga10        | 1.101 |
| ENSMUSG00000040258 | Nxph4         | 1.181 |
| ENSMUSG00000086462 | Gm13990       | 1.383 |
| ENSMUSG00000007591 | Tsk4          | 1.082 |
| ENSMUSG00000034117 | Ptgdr2        | 2.688 |
| ENSMUSG00000073758 | Sh3d21        | 1.317 |
| ENSMUSG00000076376 | Mir674        | 1.549 |
| ENSMUSG00000051236 | Msrb3         | 1.159 |
| ENSMUSG00000030739 | Myh14         | 1.349 |
| ENSMUSG00000036853 | Mcoln3        | 1.007 |
| ENSMUSG00000036687 | Tmem184a      | 1.132 |
| ENSMUSG00000034664 | Itga2b        | 1.311 |
| ENSMUSG00000097974 | Gm10605       | 1.39  |
| ENSMUSG00000045777 | Ifitm10       | 2.178 |
| ENSMUSG00000051243 | Islr2         | 1.019 |
| ENSMUSG00000085295 | 4930430E12Rik | 1.173 |
| ENSMUSG00000022768 | Ccdc116       | 1.054 |
| ENSMUSG00000108555 | Gm18310       | 1.195 |
| ENSMUSG00000024922 | Ovol1         | 1.197 |
| ENSMUSG00000009075 | Cabp7         | 1.052 |
| ENSMUSG00000031791 | Tmem38a       | 1.078 |
| ENSMUSG00000038011 | Dnah10        | 3.013 |
| ENSMUSG00000003545 | Fosb          | 1.555 |
| ENSMUSG00000034881 | Tbxa2r        | 1.937 |
| ENSMUSG00000022237 | Ankrd33b      | 1.409 |
| ENSMUSG00000055945 | Prr18         | 1.632 |
| ENSMUSG00000024330 | Col11a2       | 2.206 |
| ENSMUSG00000026864 | BIP           | 1.070 |
| ENSMUSG00000037705 | Tecta         | 1.433 |
| ENSMUSG00000098235 | Gm7497        | 1.089 |
| ENSMUSG00000002763 | Pex6          | 1.040 |

|                    |              |       |
|--------------------|--------------|-------|
| ENSMUSG0000004885  | Crabp2       | 1.775 |
| ENSMUSG00000110350 | Gm10252      | 1.713 |
| ENSMUSG00000079710 | Gm3448       | 1.876 |
| ENSMUSG00000030708 | Dnajb13      | 1.348 |
| ENSMUSG00000059674 | Cdh24        | 1.452 |
| ENSMUSG00000041566 | Tssk1        | 1.290 |
| ENSMUSG00000087434 | Rab11fip4os1 | 1.797 |

**Table S4.** The differentially expressed down-regulated genes between the control and S-VO<sub>2</sub> in RAW264.7 macrophages.

| Gene_id            | Gene_name     | Log <sub>2</sub> FC (S-VO <sub>2</sub> /Cont) |
|--------------------|---------------|-----------------------------------------------|
| ENSMUSG00000021287 | Xrcc3         | -1.092                                        |
| ENSMUSG00000044066 | Cep68         | -1.062                                        |
| ENSMUSG00000062753 | AI413582      | -1.359                                        |
| ENSMUSG00000085873 | Ttc39aos1     | -1.079                                        |
| ENSMUSG00000065601 | Mir146        | -1.490                                        |
| ENSMUSG00000028028 | Alpk1         | -1.135                                        |
| ENSMUSG00000032398 | Snape5        | -1.141                                        |
| ENSMUSG00000022372 | Sla           | -1.717                                        |
| ENSMUSG00000021886 | Gpr65         | -1.258                                        |
| ENSMUSG00000071796 | 6820431F20Rik | -1.005                                        |
| ENSMUSG00000027737 | Slc7a11       | -1.024                                        |
| ENSMUSG00000097347 | Gm17275       | -1.131                                        |
| ENSMUSG00000021895 | Arhgef3       | -1.211                                        |
| ENSMUSG00000018425 | Dhx40         | -1.094                                        |
| ENSMUSG00000111375 | Btbd8         | -1.105                                        |
| ENSMUSG00000021699 | Pde4d         | -1.163                                        |
| ENSMUSG00000055782 | Abcd2         | -1.277                                        |
| ENSMUSG00000031641 | Cbr4          | -1.008                                        |
| ENSMUSG00000020303 | Stc2          | -1.018                                        |
| ENSMUSG00000104348 | Gm37691       | -1.012                                        |
| ENSMUSG00000068457 | Uty           | -1.022                                        |
| ENSMUSG00000087153 | Gm6483        | -1.375                                        |
| ENSMUSG00000102602 | A930004J17Rik | -1.120                                        |
| ENSMUSG00000029178 | Klf3          | -1.055                                        |
| ENSMUSG00000035164 | Zc3h12c       | -1.164                                        |
| ENSMUSG00000041225 | Arhgap12      | -1.268                                        |
| ENSMUSG00000046546 | Fam43a        | -1.008                                        |
| ENSMUSG00000030717 | Nupr1         | -1.160                                        |
| ENSMUSG00000027615 | Hps3          | -1.018                                        |
| ENSMUSG00000028525 | Pde4b         | -1.034                                        |
| ENSMUSG00000021876 | Rnase4        | -1.091                                        |
| ENSMUSG00000029419 | Gm996         | -1.073                                        |
| ENSMUSG00000061852 | Gm7582        | -1.323                                        |
| ENSMUSG00000022960 | Donson        | -1.050                                        |

|                    |               |        |
|--------------------|---------------|--------|
| ENSMUSG00000093622 | Gm20703       | -1.059 |
| ENSMUSG00000103527 | Gm37261       | -1.005 |
| ENSMUSG00000029650 | Slc46a3       | -1.494 |
| ENSMUSG00000032690 | Oas2          | -1.141 |
| ENSMUSG00000021127 | Zfp3611       | -1.077 |
| ENSMUSG00000040093 | Bmf           | -1.283 |
| ENSMUSG00000108732 | 2310043P16Rik | -1.176 |
| ENSMUSG00000024778 | Fas           | -1.314 |
| ENSMUSG00000025154 | Arhgap19      | -1.060 |
| ENSMUSG00000073478 | D730003I15Rik | -1.262 |
| ENSMUSG00000041695 | Kcnj2         | -1.668 |
| ENSMUSG00000022091 | Sorbs3        | -1.106 |
| ENSMUSG00000032010 | Usp2          | -1.068 |
| ENSMUSG00000031004 | Mki67         | -1.130 |
| ENSMUSG00000021990 | Spata13       | -1.174 |
| ENSMUSG00000103651 | Gm37206       | -1.182 |
| ENSMUSG00000029490 | Mfsd7a        | -1.037 |
| ENSMUSG00000021470 | Ercc6l2       | -1.025 |
| ENSMUSG00000108845 | Gm45090       | -1.009 |
| ENSMUSG00000043629 | 1700019D03Rik | -1.286 |
| ENSMUSG00000046111 | Cep295        | -1.205 |
| ENSMUSG00000073647 | Gm10557       | -1.055 |
| ENSMUSG00000045193 | Cirbp         | -1.069 |
| ENSMUSG00000038910 | Plcl2         | -1.018 |
| ENSMUSG00000096221 | 1500002C15Rik | -1.469 |
| ENSMUSG00000048216 | Gpr85         | -1.107 |
| ENSMUSG00000019763 | Rmnd1         | -1.109 |
| ENSMUSG00000062901 | Klhl24        | -1.180 |
| ENSMUSG00000078606 | Gm4070        | -1.017 |
| ENSMUSG00000027901 | Dennd2d       | -1.607 |
| ENSMUSG00000005501 | Usp40         | -1.102 |
| ENSMUSG00000096210 | H1f0          | -1.304 |
| ENSMUSG00000026548 | Slamf9        | -1.191 |
| ENSMUSG00000044966 | Fbxo48        | -1.331 |
| ENSMUSG00000028497 | Hacd4         | -1.261 |
| ENSMUSG00000026779 | Mastl         | -1.275 |
| ENSMUSG00000062980 | Cped1         | -1.206 |
| ENSMUSG00000037608 | Bclaf1        | -1.032 |
| ENSMUSG00000105272 | Gm43071       | -1.173 |
| ENSMUSG00000020399 | Havcr2        | -1.605 |
| ENSMUSG00000097042 | Gm17491       | -1.260 |
| ENSMUSG00000092274 | Neat1         | -1.819 |
| ENSMUSG00000027122 | Arl14ep       | -1.178 |
| ENSMUSG00000033952 | Aspm          | -1.073 |
| ENSMUSG00000095123 | Gm21781       | -1.347 |
| ENSMUSG00000053062 | Jam2          | -1.051 |

|                    |                |        |
|--------------------|----------------|--------|
| ENSMUSG00000042851 | Zc3h6          | -1.052 |
| ENSMUSG00000026928 | Card9          | -1.260 |
| ENSMUSG00000095403 | Gm21092        | -1.033 |
| ENSMUSG00000031502 | Col4a1         | -1.105 |
| ENSMUSG00000058515 | Olfr933        | -1.597 |
| ENSMUSG00000037926 | Ssh2           | -1.078 |
| ENSMUSG00000054409 | Tmem74         | -1.070 |
| ENSMUSG00000023940 | Sgol1          | -1.108 |
| ENSMUSG00000069892 | 9930111J21Rik2 | -1.165 |
| ENSMUSG00000044583 | Tlr7           | -1.173 |
| ENSMUSG00000049164 | Zfp518a        | -1.273 |
| ENSMUSG00000026315 | Serpinb8       | -1.414 |
| ENSMUSG00000053641 | Dennd4a        | -1.106 |
| ENSMUSG00000085287 | 4833418N02Rik  | -1.109 |
| ENSMUSG00000090799 | Klhl33         | -1.527 |
| ENSMUSG00000050103 | Agmo           | -1.170 |
| ENSMUSG00000107017 | Gm43196        | -1.319 |
| ENSMUSG00000057894 | Zfp329         | -1.126 |
| ENSMUSG00000022364 | Tbc1d31        | -1.042 |
| ENSMUSG00000051169 | Rpusd3         | -1.204 |
| ENSMUSG00000104548 | Gm43857        | -1.150 |
| ENSMUSG00000091575 | 2010016I18Rik  | -1.775 |
| ENSMUSG00000057110 | Cntrl          | -1.256 |
| ENSMUSG00000047735 | Samd9l         | -1.297 |
| ENSMUSG00000097572 | Gm26797        | -1.130 |
| ENSMUSG00000078671 | Chd2           | -1.111 |
| ENSMUSG00000038564 | Ift172         | -1.021 |
| ENSMUSG00000041642 | Kif21b         | -1.148 |
| ENSMUSG00000094915 | AC168977.2     | -1.098 |
| ENSMUSG00000042129 | Rassf4         | -1.040 |
| ENSMUSG00000048424 | Ranbp31        | -1.792 |
| ENSMUSG00000106415 | Gm42893        | -1.101 |
| ENSMUSG00000108738 | Gm44777        | -1.201 |
| ENSMUSG00000043336 | Filip1l        | -1.923 |
| ENSMUSG00000107215 | Gm43197        | -1.840 |
| ENSMUSG00000036890 | Gtdc1          | -1.086 |
| ENSMUSG00000020256 | Aldh1l2        | -1.273 |
| ENSMUSG00000041132 | N4bp2l1        | -1.244 |
| ENSMUSG00000097195 | Snhg5          | -1.087 |
| ENSMUSG00000078942 | Naip6          | -1.067 |
| ENSMUSG00000022357 | Klhl38         | -1.017 |
| ENSMUSG00000110849 | CT025680.2     | -1.192 |
| ENSMUSG00000024883 | Rin1           | -1.448 |
| ENSMUSG00000037646 | Vps13b         | -1.043 |
| ENSMUSG00000045092 | S1pr1          | -1.030 |
| ENSMUSG00000079293 | Clec7a         | -1.056 |

|                     |                |        |
|---------------------|----------------|--------|
| ENSMUSG00000008496  | Pou2f2         | -1.058 |
| ENSMUSG00000105078  | Gm35911        | -1.286 |
| ENSMUSG00000010461  | Eya4           | -1.271 |
| ENSMUSG000000089756 | Zfp966         | -1.057 |
| ENSMUSG000000025014 | Dntt           | -1.331 |
| ENSMUSG000000056673 | Kdm5d          | -1.143 |
| ENSMUSG000000099041 | Gm28035        | -1.674 |
| ENSMUSG000000030745 | Il21r          | -1.072 |
| ENSMUSG000000058291 | Zfp68          | -1.042 |
| ENSMUSG000000054855 | Rnd1           | -1.041 |
| ENSMUSG000000072915 | Gm12258        | -1.052 |
| ENSMUSG000000072889 | Nfxl1          | -1.142 |
| ENSMUSG000000058402 | Zfp420         | -1.139 |
| ENSMUSG000000096802 | Gm15433        | -1.461 |
| ENSMUSG000000071656 | Lrrn4cl        | -1.527 |
| ENSMUSG00000100017  | 2410022M11Rik  | -1.236 |
| ENSMUSG000000042579 | 4632404H12Rik  | -1.088 |
| ENSMUSG000000056215 | Lrguk          | -1.399 |
| ENSMUSG000000028542 | Slc6a9         | -1.232 |
| ENSMUSG000000090186 | Gm7592         | -1.412 |
| ENSMUSG000000037913 | Tmem156        | -1.053 |
| ENSMUSG000000040165 | Cd209c         | -1.070 |
| ENSMUSG000000040943 | Tet2           | -1.042 |
| ENSMUSG000000047153 | Khyn           | -1.127 |
| ENSMUSG000000060301 | 2610008E11Rik  | -1.305 |
| ENSMUSG000000056130 | Ticam2         | -1.449 |
| ENSMUSG000000051166 | Eml5           | -1.064 |
| ENSMUSG000000032712 | 2810474O19Rik  | -1.356 |
| ENSMUSG000000069893 | 9930111J21Rik1 | -1.021 |
| ENSMUSG000000011831 | Evi5           | -1.007 |
| ENSMUSG000000046027 | Stard5         | -1.228 |
| ENSMUSG000000028838 | Extl1          | -1.352 |
| ENSMUSG000000059540 | Tcea2          | -1.032 |
| ENSMUSG000000028179 | Cth            | -1.013 |
| ENSMUSG000000029165 | Agbl5          | -1.326 |
| ENSMUSG000000020142 | Slc1a4         | -1.348 |
| ENSMUSG000000039158 | Akna           | -1.012 |
| ENSMUSG000000023952 | Gtpbp2         | -1.042 |
| ENSMUSG00000104350  | Gm38244        | -1.908 |
| ENSMUSG000000092341 | Malat1         | -1.541 |
| ENSMUSG000000020381 | Mrnip          | -1.168 |
| ENSMUSG000000037533 | Rapgef6        | -1.081 |
| ENSMUSG00000107577  | Gm44103        | -1.089 |
| ENSMUSG000000004698 | Hdac9          | -1.453 |
| ENSMUSG000000035967 | Ints6l         | -1.527 |
| ENSMUSG000000034959 | Rubcnl         | -1.396 |

|                    |               |        |
|--------------------|---------------|--------|
| ENSMUSG00000029544 | Cabp1         | -1.460 |
| ENSMUSG00000027438 | Napb          | -1.061 |
| ENSMUSG00000007872 | Id3           | -1.215 |
| ENSMUSG00000062310 | Glrp1         | -1.136 |
| ENSMUSG00000032607 | Amt           | -1.019 |
| ENSMUSG00000056919 | Cep162        | -1.384 |
| ENSMUSG00000074342 | I830077J02Rik | -1.134 |
| ENSMUSG00000025323 | Sp4           | -1.065 |
| ENSMUSG00000034160 | Ogt           | -1.017 |
| ENSMUSG00000020826 | Nos2          | -1.336 |
| ENSMUSG00000020275 | Rel           | -1.030 |
| ENSMUSG00000022667 | Cd200r1       | -1.021 |
| ENSMUSG00000041147 | Brca2         | -1.220 |
| ENSMUSG00000056749 | Nfil3         | -1.157 |
| ENSMUSG00000082082 | Gm13230       | -1.110 |
| ENSMUSG00000003032 | Klf4          | -1.170 |
| ENSMUSG00000066510 | Ankdd1a       | -1.294 |
| ENSMUSG00000057329 | Bcl2          | -1.302 |
| ENSMUSG00000054293 | A630033H20Rik | -1.080 |
| ENSMUSG00000046688 | Tifa          | -1.283 |
| ENSMUSG00000050555 | Hyls1         | -1.004 |

**Table S5.** The differentially expressed up-regulated genes between the control and M-VO<sub>2</sub> in RAW264.7 macrophages.

| Gene_id            | Gene_name     | Log <sub>2</sub> FC(M-VO <sub>2</sub> /Cont) |
|--------------------|---------------|----------------------------------------------|
| ENSMUSG00000051747 | Ttn           | 1.389                                        |
| ENSMUSG00000026475 | Rgs16         | 1.285                                        |
| ENSMUSG00000024873 | Cnih2         | 1.819                                        |
| ENSMUSG00000055865 | Fam19a3       | 1.243                                        |
| ENSMUSG00000053964 | Lgals4        | 1.052                                        |
| ENSMUSG00000107092 | Gm7993        | 1.445                                        |
| ENSMUSG00000035745 | Grin3b        | 1.637                                        |
| ENSMUSG00000049928 | Glp2r         | 1.334                                        |
| ENSMUSG00000091685 | Gm17359       | 1.662                                        |
| ENSMUSG00000070385 | Ampd1         | 1.388                                        |
| ENSMUSG00000029135 | Fosl2         | 1.037                                        |
| ENSMUSG00000031898 | Dpep3         | 1.183                                        |
| ENSMUSG00000027579 | Srms          | 1.307                                        |
| ENSMUSG00000068957 | 4930589L23Rik | 1.133                                        |
| ENSMUSG00000045349 | Sh2d5         | 1.161                                        |
| ENSMUSG00000027329 | Spef1         | 1.440                                        |
| ENSMUSG00000027950 | Chrb2         | 1.085                                        |
| ENSMUSG00000031861 | Lpar2         | 1.544                                        |
| ENSMUSG00000075585 | 6330403L08Rik | 1.657                                        |
| ENSMUSG00000062591 | Tubb4a        | 1.242                                        |



|                    |               |       |
|--------------------|---------------|-------|
| ENSMUSG00000048458 | Fam212b       | 1.183 |
| ENSMUSG00000034416 | Pkd112        | 1.090 |
| ENSMUSG00000103966 | Gm37120       | 2.046 |
| ENSMUSG00000074340 | Ovgp1         | 1.153 |
| ENSMUSG00000033717 | Adra2a        | 1.173 |
| ENSMUSG00000002100 | Mybpc3        | 2.229 |
| ENSMUSG00000030124 | Lag3          | 1.001 |
| ENSMUSG00000028794 | A3galt2       | 1.318 |
| ENSMUSG00000086962 | Gm12248       | 1.021 |
| ENSMUSG00000035112 | Wnk4          | 1.108 |
| ENSMUSG00000043243 | Fam129c       | 1.055 |
| ENSMUSG00000027570 | Col9a3        | 1.144 |
| ENSMUSG00000030680 | Pagr1a        | 1.035 |
| ENSMUSG00000018752 | Tnfsfm13      | 1.074 |
| ENSMUSG00000025986 | Slc39a10      | 1.004 |
| ENSMUSG00000097855 | A930007I19Rik | 1.338 |
| ENSMUSG00000019326 | Aoc3          | 2.253 |
| ENSMUSG00000073627 | C130036L24Rik | 1.288 |
| ENSMUSG00000109953 | 5430430B14Rik | 1.684 |
| ENSMUSG00000002565 | Scin          | 1.851 |
| ENSMUSG00000023247 | Guca2a        | 1.256 |
| ENSMUSG00000097337 | Gm26606       | 1.569 |
| ENSMUSG00000068699 | Flnc          | 1.030 |
| ENSMUSG00000040283 | Btnl9         | 1.183 |
| ENSMUSG00000019464 | Ptger1        | 1.790 |
| ENSMUSG00000109198 | D7Bwg0826e    | 1.069 |
| ENSMUSG00000103845 | Gm19026       | 1.174 |
| ENSMUSG00000002006 | Pdzd4         | 1.257 |
| ENSMUSG00000049515 | Espnl         | 1.205 |
| ENSMUSG00000085875 | Gm12905       | 1.289 |
| ENSMUSG00000051107 | Gm15440       | 1.057 |
| ENSMUSG00000023993 | Trem1l        | 1.193 |
| ENSMUSG00000054206 | Gzmm          | 1.324 |
| ENSMUSG00000091952 | Gm17709       | 1.008 |
| ENSMUSG00000033615 | Cplx1         | 1.042 |
| ENSMUSG00000032657 | Fam189b       | 1.296 |
| ENSMUSG00000043421 | Hilpda        | 1.015 |
| ENSMUSG00000033967 | Rnf225        | 1.820 |
| ENSMUSG00000044390 | Tigd3         | 1.066 |
| ENSMUSG00000001027 | Scn4a         | 1.512 |
| ENSMUSG00000113100 | CT009754.2    | 1.627 |
| ENSMUSG00000025650 | Col7a1        | 1.577 |
| ENSMUSG00000112496 | AC121569.2    | 1.112 |
| ENSMUSG00000090210 | Itga10        | 1.163 |
| ENSMUSG00000034117 | Ptgdr2        | 1.660 |
| ENSMUSG00000034664 | Itga2b        | 1.147 |

|                    |              |       |
|--------------------|--------------|-------|
| ENSMUSG00000045777 | Ifitm10      | 1.006 |
| ENSMUSG00000022237 | Ankrd33b     | 1.035 |
| ENSMUSG00000055945 | Prr18        | 1.106 |
| ENSMUSG00000024330 | Col11a2      | 2.113 |
| ENSMUSG00000110350 | Gm10252      | 1.163 |
| ENSMUSG00000079710 | Gm3448       | 1.193 |
| ENSMUSG00000030708 | Dnajb13      | 1.112 |
| ENSMUSG00000087434 | Rab11fip4os1 | 1.336 |
| ENSMUSG00000085586 | Gm11613      | 1.234 |
| ENSMUSG00000107944 | Gm44280      | 1.316 |
| ENSMUSG00000050675 | Gp1ba        | 1.242 |
| ENSMUSG00000024347 | Psd2         | 1.776 |
| ENSMUSG00000055494 | Gm14168      | 1.174 |
| ENSMUSG00000021403 | Serpinb9b    | 1.126 |
| ENSMUSG00000009145 | Dqx1         | 1.606 |
| ENSMUSG00000103588 | Gm18445      | 1.069 |
| ENSMUSG00000078486 | Perm1        | 1.341 |
| ENSMUSG00000004105 | Angptl2      | 1.443 |
| ENSMUSG00000053693 | Mast1        | 1.578 |
| ENSMUSG00000078816 | Prkcg        | 1.043 |
| ENSMUSG00000030882 | Dnhd1        | 1.796 |
| ENSMUSG00000038751 | Ptk6         | 1.193 |
| ENSMUSG00000105628 | Gm43350      | 1.006 |
| ENSMUSG00000028158 | Mttp         | 1.192 |
| ENSMUSG00000031302 | Nlgn3        | 1.166 |
| ENSMUSG00000001739 | Cldn15       | 1.176 |
| ENSMUSG00000086075 | Gm15728      | 1.211 |
| ENSMUSG00000043099 | Hic1         | 1.050 |
| ENSMUSG00000079652 | Fam71f2      | 1.071 |
| ENSMUSG00000001930 | Vwf          | 1.089 |
| ENSMUSG00000096740 | Lbhd1        | 1.296 |
| ENSMUSG00000004098 | Col5a3       | 1.036 |
| ENSMUSG00000073633 | Fbxo36       | 1.185 |
| ENSMUSG00000032131 | Abcg4        | 1.556 |
| ENSMUSG00000026604 | Ptpn14       | 1.426 |
| ENSMUSG00000020793 | Galr2        | 1.094 |
| ENSMUSG00000040797 | Iqsec3       | 1.023 |
| ENSMUSG00000105852 | Gm42890      | 1.167 |
| ENSMUSG00000110218 | Gm20219      | 1.373 |
| ENSMUSG00000031486 | Adgra2       | 1.130 |
| ENSMUSG00000036091 | Hyal3        | 1.005 |
| ENSMUSG00000041842 | Fhdc1        | 1.333 |
| ENSMUSG00000058743 | Kcnj14       | 1.062 |
| ENSMUSG00000038486 | Sv2a         | 1.100 |
| ENSMUSG00000016356 | Col20a1      | 1.647 |

---

**Table S6.** The differentially expressed down-regulated genes between the control and M-VO<sub>2</sub> in RAW264.7 macrophages.

| Gene_id            | Gene_name     | Log <sub>2</sub> FC(M-VO <sub>2</sub> /Cont) |
|--------------------|---------------|----------------------------------------------|
| ENSMUSG00000091780 | Sco2          | -1.122                                       |
| ENSMUSG00000024011 | Pi16          | -1.182                                       |
| ENSMUSG00000040618 | Pck2          | -1.091                                       |
| ENSMUSG00000048424 | Ranbp31       | -1.728                                       |
| ENSMUSG00000036390 | Gadd45a       | -1.066                                       |
| ENSMUSG00000020256 | Aldh112       | -1.089                                       |
| ENSMUSG00000036820 | Amdhd2        | -1.011                                       |
| ENSMUSG00000024883 | Rin1          | -1.069                                       |
| ENSMUSG00000028542 | Slc6a9        | -1.477                                       |
| ENSMUSG00000046027 | Stard5        | -1.132                                       |
| ENSMUSG00000028838 | Extl1         | -1.174                                       |
| ENSMUSG00000034959 | Rubcnl        | -1.075                                       |
| ENSMUSG00000007872 | Id3           | -1.424                                       |
| ENSMUSG00000020826 | Nos2          | -1.048                                       |
| ENSMUSG00000006638 | Abhd1         | -1.09                                        |
| ENSMUSG00000056749 | Nfil3         | -1.078                                       |
| ENSMUSG00000057329 | Bcl2          | -1.054                                       |
| ENSMUSG00000062753 | AI413582      | -1.344                                       |
| ENSMUSG00000059412 | Fxyd2         | -1.095                                       |
| ENSMUSG00000030785 | Cox6a2        | -1.020                                       |
| ENSMUSG00000022372 | Sla           | -1.187                                       |
| ENSMUSG00000020604 | Arsg          | -1.005                                       |
| ENSMUSG00000032715 | Trib3         | -1.252                                       |
| ENSMUSG00000061852 | Gm7582        | -1.073                                       |
| ENSMUSG00000029650 | Slc46a3       | -1.100                                       |
| ENSMUSG00000073478 | D730003I15Rik | -1.059                                       |
| ENSMUSG00000032010 | Usp2          | -1.350                                       |
| ENSMUSG00000029815 | Malsu1        | -1.095                                       |
| ENSMUSG00000096221 | 1500002C15Rik | -1.020                                       |

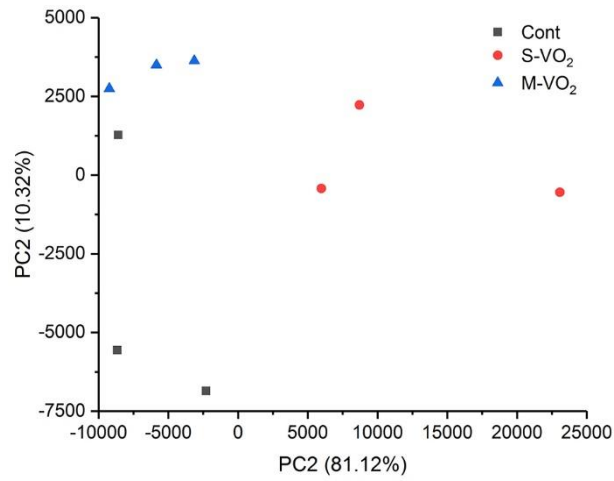

**Figure S1.** Principal component analysis (PCA) of RNA-seq results of the control, the S-VO<sub>2</sub> group, and the M-VO<sub>2</sub> group.

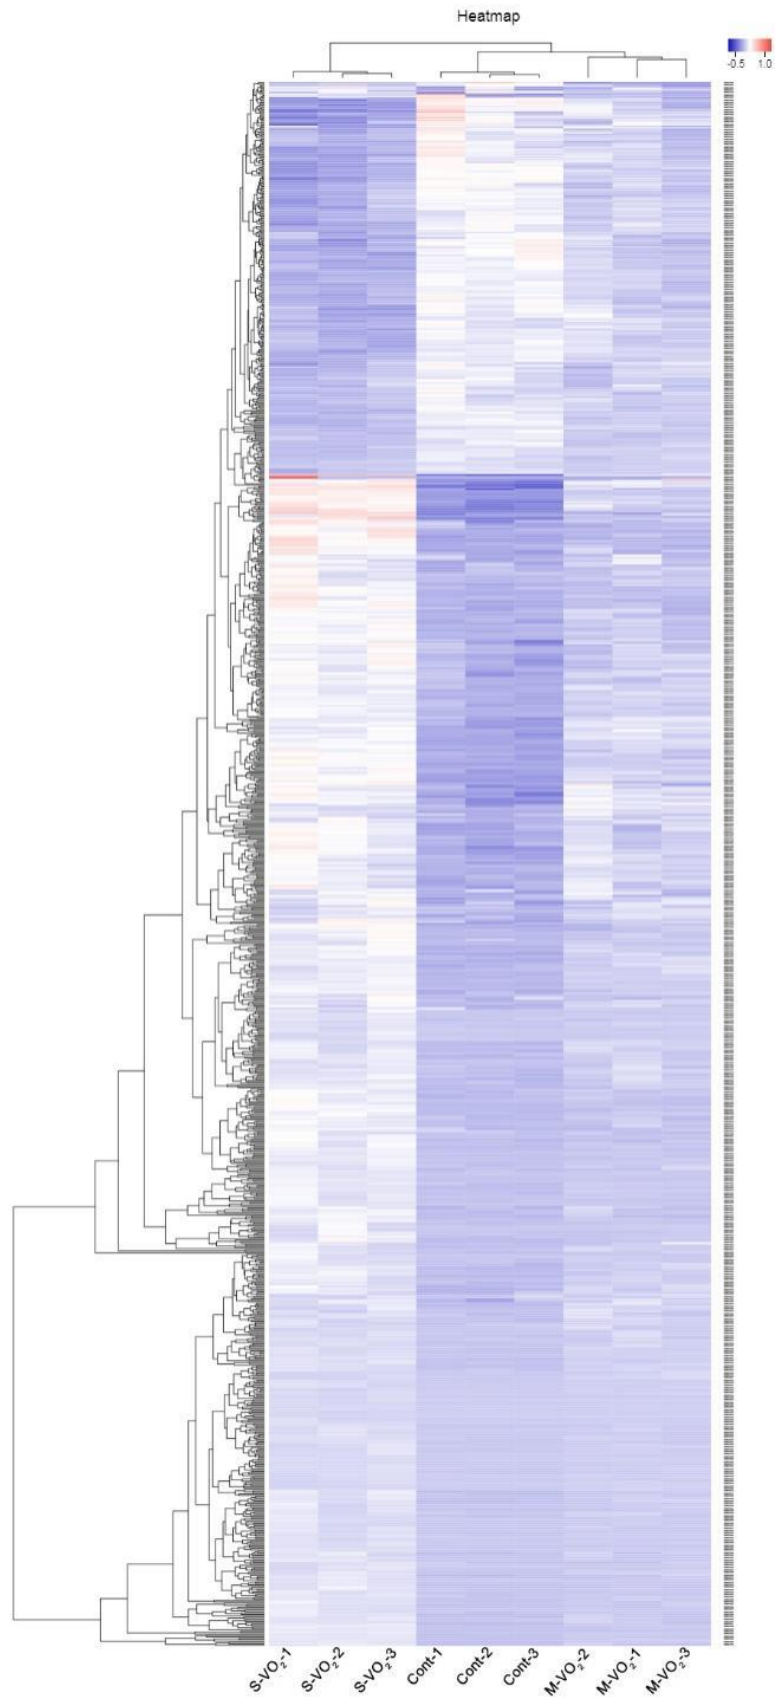

**Figure S2.** Hierarchical clustering image showing the differential gene expression profiles of Raw264.7 cells after exposure to S-VO<sub>2</sub> and M-VO<sub>2</sub>.

FcγR-MEDIATED PHAGOCYTOSIS

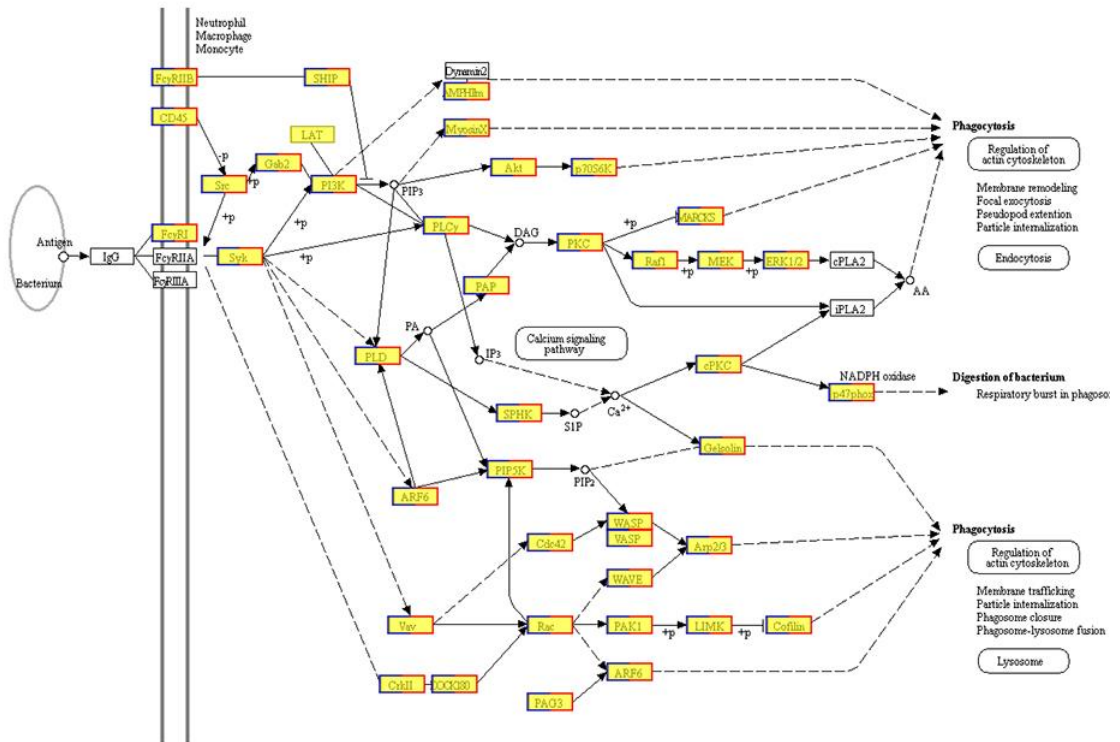

Figure S3. KEGG pathway of Fc gamma R-mediated phagocytosis.

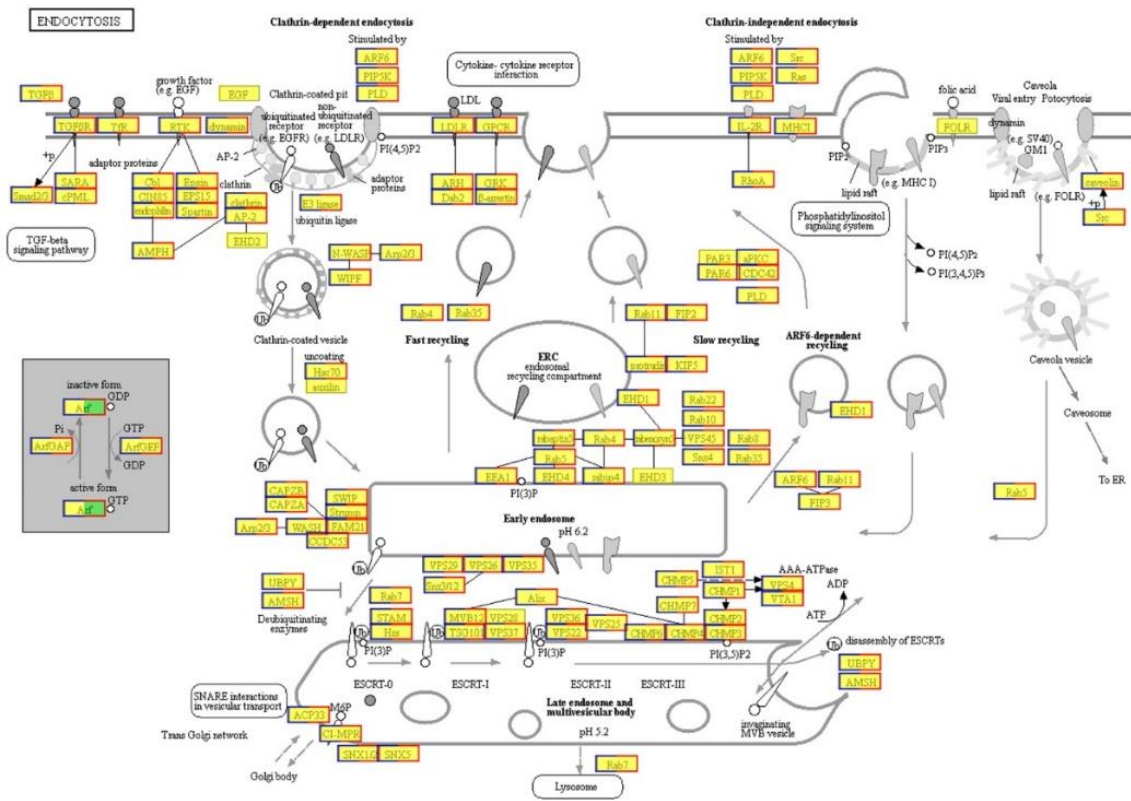

Figure S4. KEGG pathway of endocytosis.









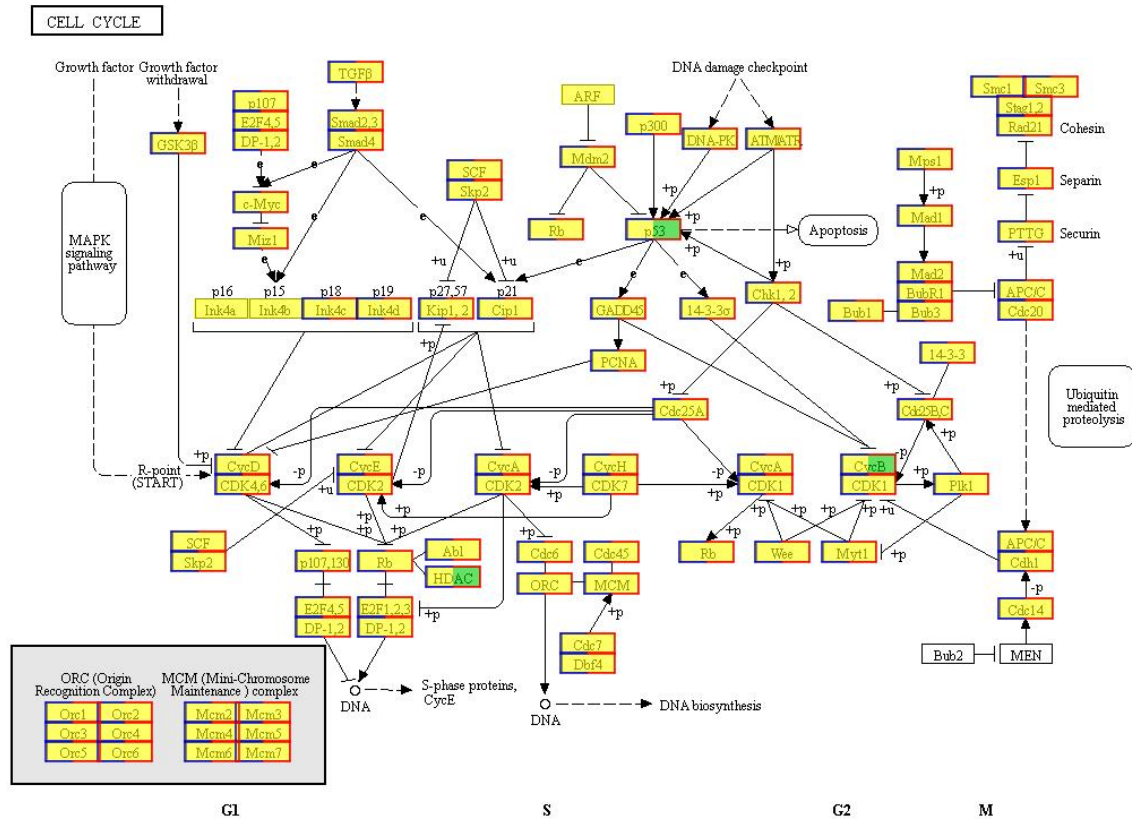

**Figure S9. KEGG pathway of cell cycle.**

DNA REPLICATION

Replication complex (Bacteria)

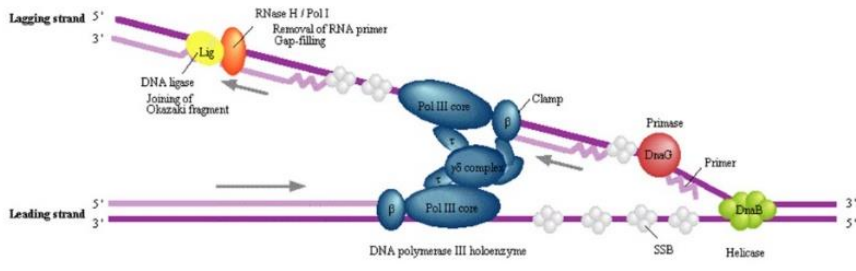

DNA polymerase III holoenzyme

|       |   |       |  |
|-------|---|-------|--|
|       |   | β     |  |
|       |   | ε     |  |
|       |   | α     |  |
|       |   | γ & τ |  |
| Clamp | ψ | δ'    |  |
|       | β | δ     |  |

Pol III core

γδ complex

|          |         |     |
|----------|---------|-----|
| Helicase | Primase |     |
| DnaB     | DnaG    | SSB |

|           |                  |            |
|-----------|------------------|------------|
| RNaseH    | DNA polymerase I | DNA ligase |
| RNaseHI   | Dpol             | Lig        |
| RNaseHII  |                  |            |
| RNaseHIII |                  |            |

Replication complex (Archaea)

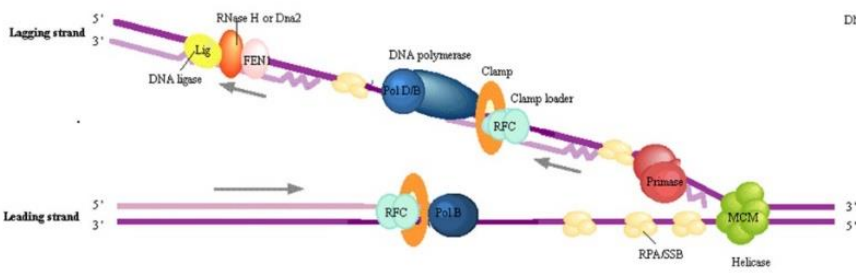

DNA polymerase B DNA polymerase D

|      |       |  |
|------|-------|--|
| PolB | PolD1 |  |
|      | PolD2 |  |

|          |         |         |
|----------|---------|---------|
| Helicase | Primase | RFA/SSB |
| MCM      | Pri1    | SPA     |
|          | Pri2    |         |

|       |              |          |
|-------|--------------|----------|
| Clamp | Clamp loader | RNaseH   |
| PCNA  | RFS          | RNaseHI  |
|       | RfL          | RNaseHII |

|          |            |  |
|----------|------------|--|
| Helicase | DNA ligase |  |
| Dna2     | Lig        |  |

Replication complex (Eukaryotes)

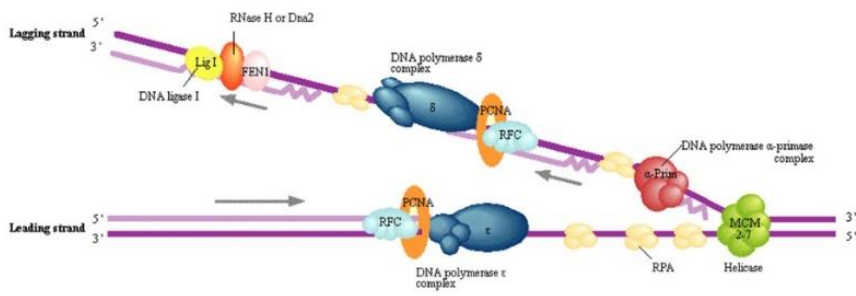

DNA polymerase α-primase complex

|    |    |      |      |
|----|----|------|------|
| α1 | α2 | Pri1 | Pri2 |
|----|----|------|------|

DNA polymerase δ complex

|    |    |    |    |
|----|----|----|----|
| δ1 | δ2 | δ3 | δ4 |
|----|----|----|----|

DNA polymerase ε complex

|    |    |    |    |
|----|----|----|----|
| ε1 | ε2 | ε3 | ε4 |
|----|----|----|----|

MCM complex (helicase)

|      |      |  |
|------|------|--|
| Mcm2 | Mcm3 |  |
| Mcm4 | Mcm5 |  |
| Mcm6 | Mcm7 |  |

RFA

|        |
|--------|
| RFA1   |
| RFA2/4 |
| RFA3   |

|       |              |        |
|-------|--------------|--------|
| Clamp | Clamp loader |        |
| PCNA  | RFC1         | RFC2/4 |
|       |              | RFC3/5 |

|         |          |        |
|---------|----------|--------|
| RNaseHI | RNaseHII |        |
| RNaseHI | RNaseG   | RNaseH |
|         | RNaseG   | RNaseH |

|          |            |  |
|----------|------------|--|
| Helicase | DNA ligase |  |
| Dna2     | Lig1       |  |

Figure S10. KEGG pathway of DNA replication.





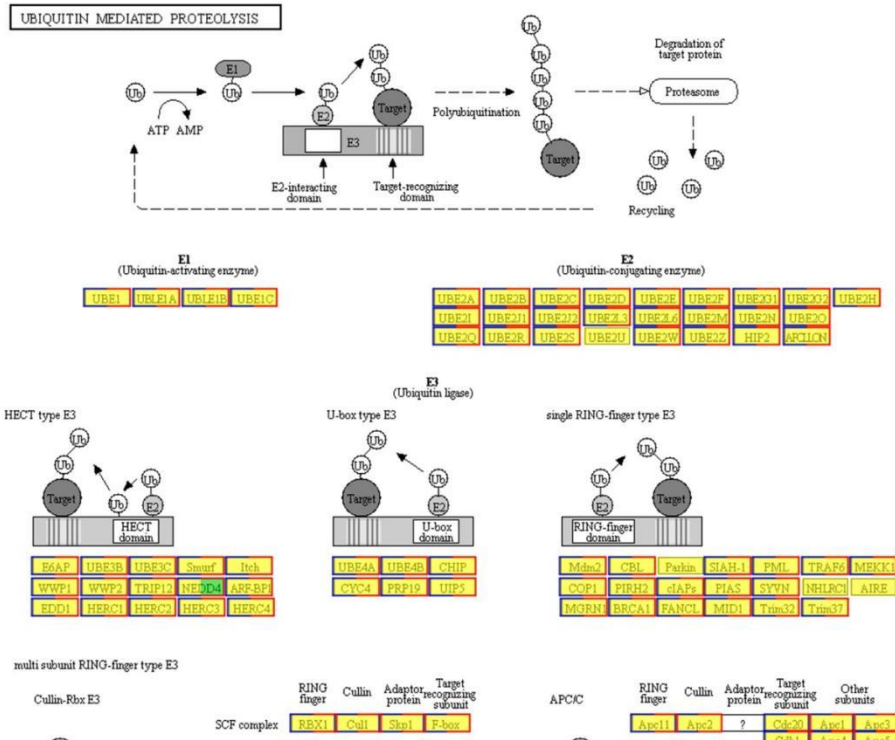

**Figure S14.** KEGG pathway of ubiquitin mediated proteolysis.

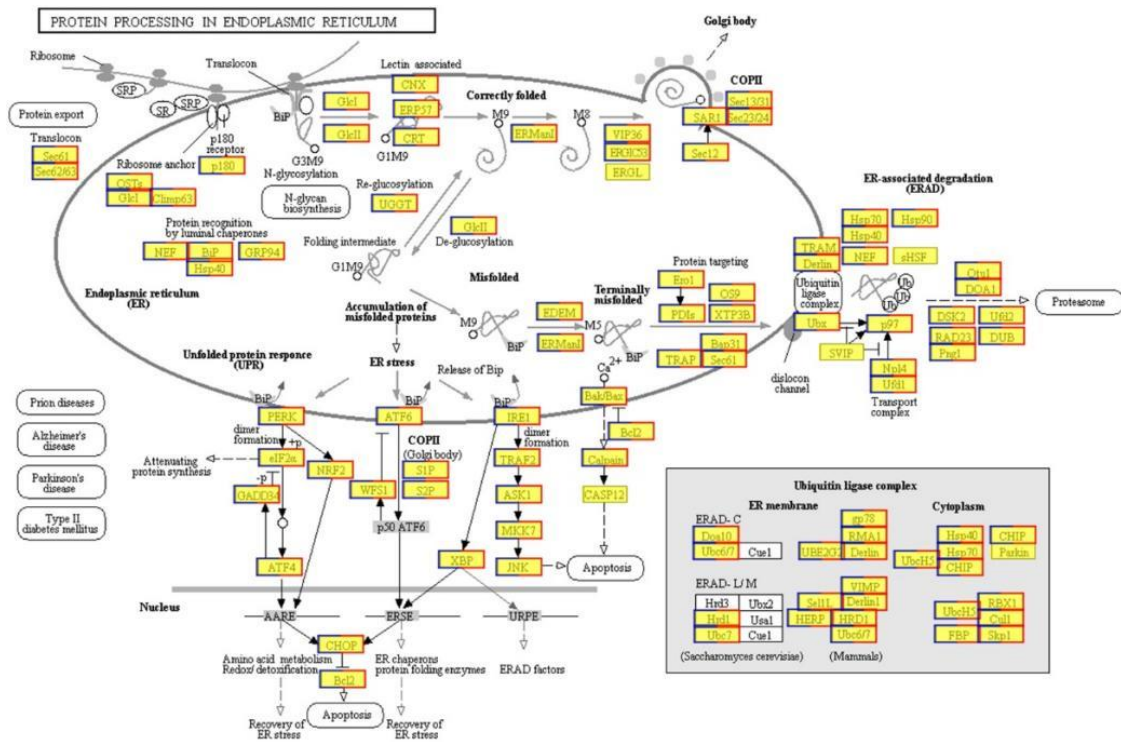

**Figure S15.** KEGG pathway of protein processing in endoplasmic reticulum.



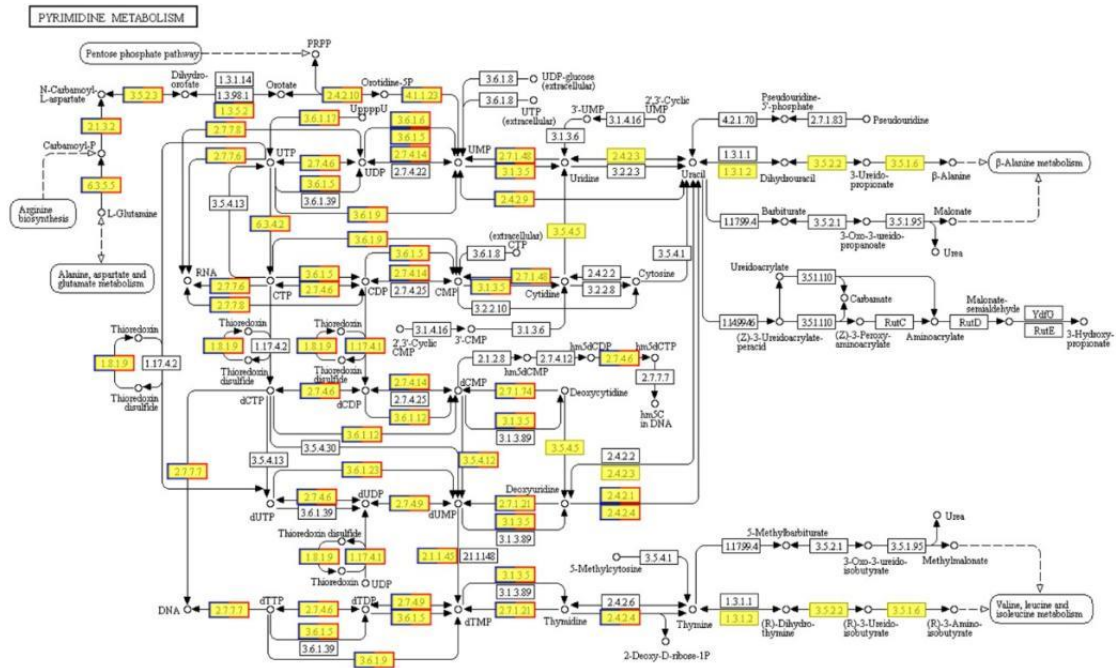

Figure S16. KEGG pathway of pyrimidine metabolism.

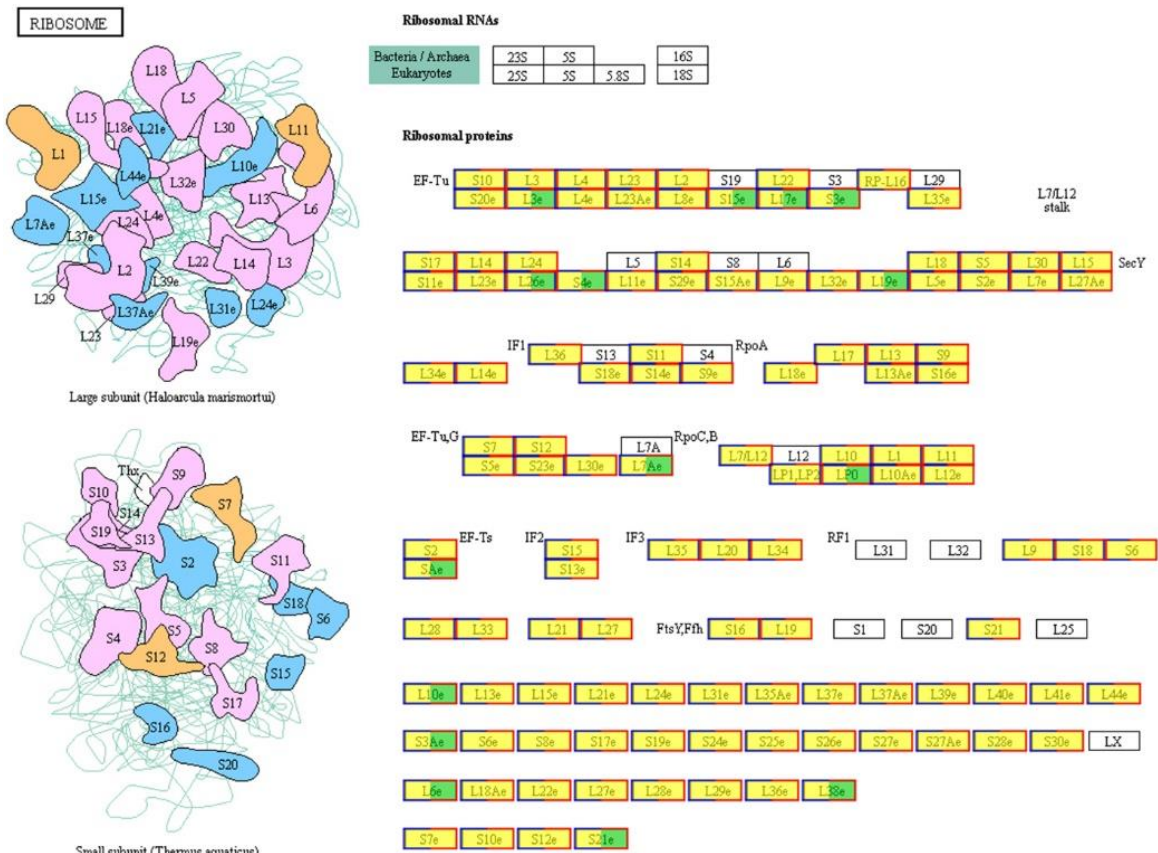

Figure S17. KEGG pathway of ribosome.

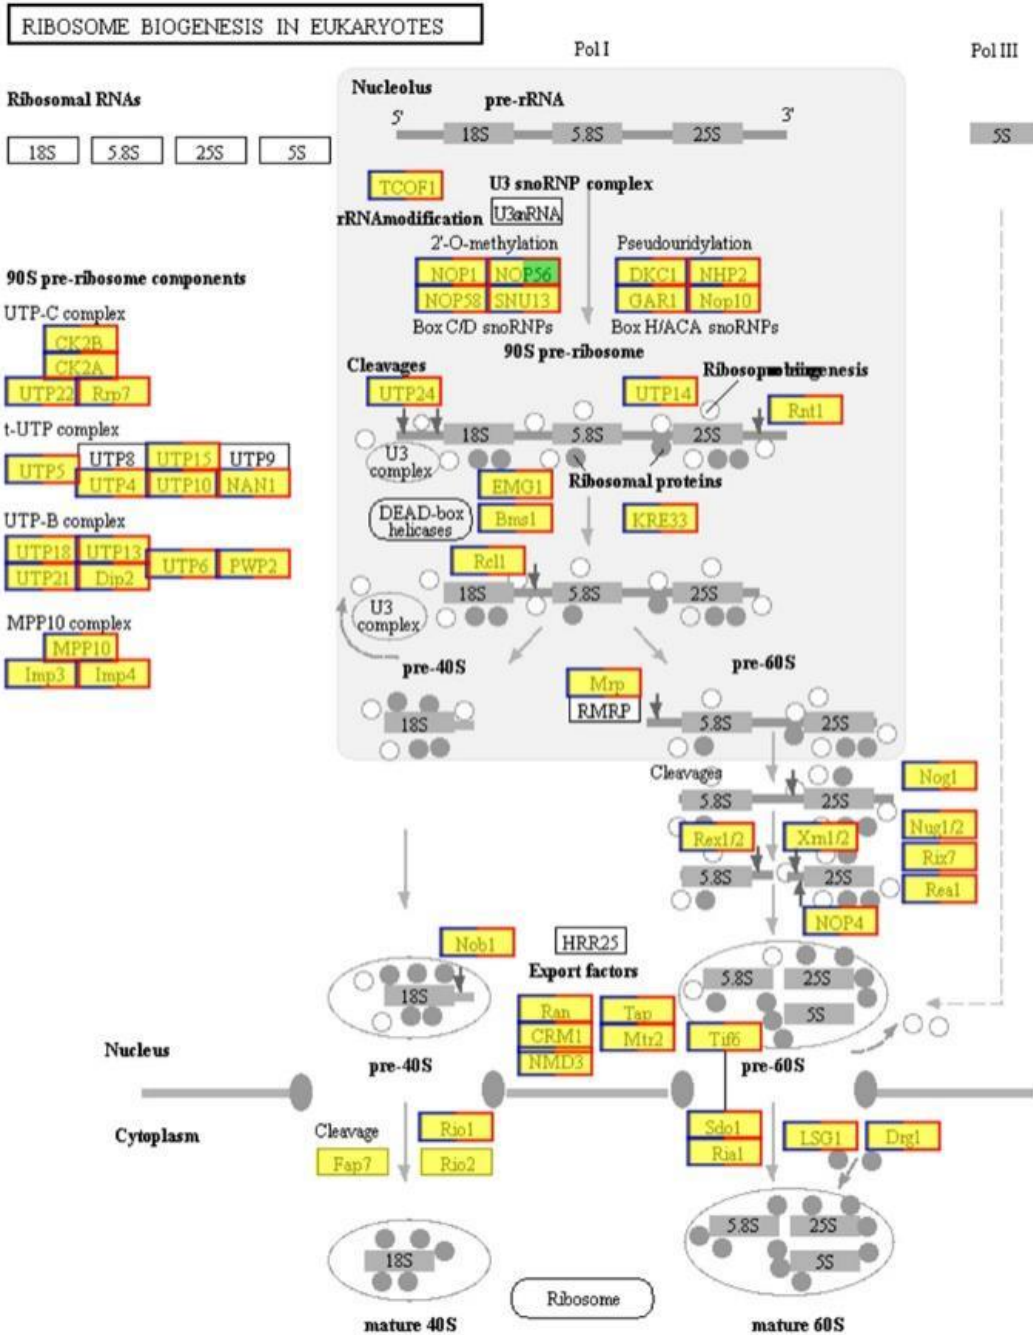

**Figure S18.** KEGG pathway of ribosome biogenesis in eukaryotes.

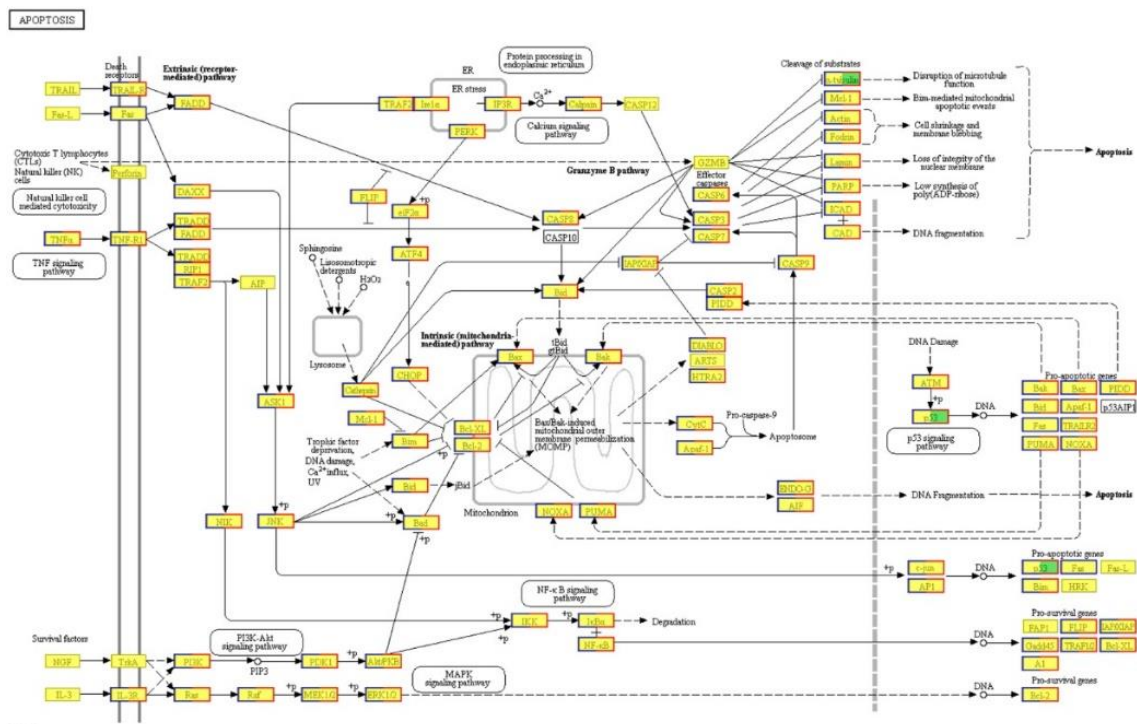

Figure S19. KEGG pathway of apoptosis.

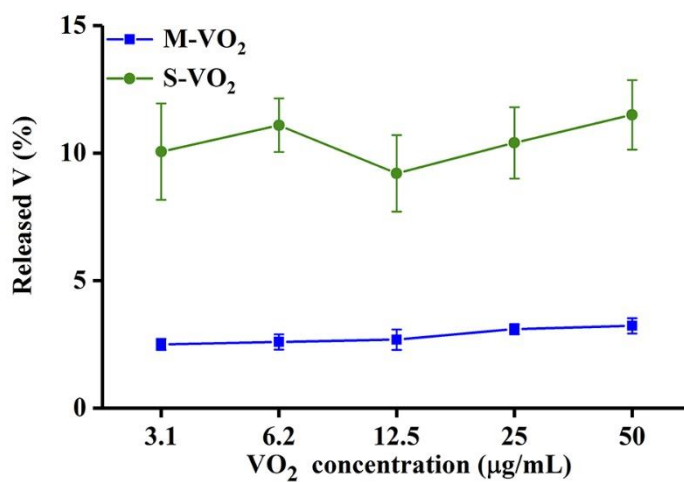

Figure S20. Dissolutions of VO<sub>2</sub> in different concentration in culture medium under the cell culture condition.
